# Supplementary material for: Cholesteroled polymer (Chol-b-Lys)-based nanoparticles (CL-NPs) confer antibacterial efficacy without resistance
Source: Royal Society of Chemistry journal article supplement (doi:10.1039/d1nj03944j), 2021-01-01
Supplement: d1nj03944j1.pdf [file d1nj03944j1.pdf]

## Supporting Information

# Cholesteroled polymer (Chol-b-Lys)-based nanoparticles (CL-NPs) confer antibacterial efficacy without resistance

Huan-Huan Ding,<sup>a</sup> Jia-Zhu Chigan,<sup>a</sup> Jian-Bin Zhen,<sup>a</sup> Lu Liu,<sup>a</sup> Yin-Sui Xu,<sup>a</sup> Cheng Chen,<sup>a</sup> and Ke-Wu Yang<sup>\*a</sup>

### Proton Nuclear Magnetic Resonance (<sup>1</sup>H NMR)

The NMR spectrum was recorded on a Bruker AV 400 MHz spectrometer, using tetramethylsilane as an internal standard and DMSO-d<sub>6</sub> as solvent. The sample concentration was ca. 10 mg/mL.

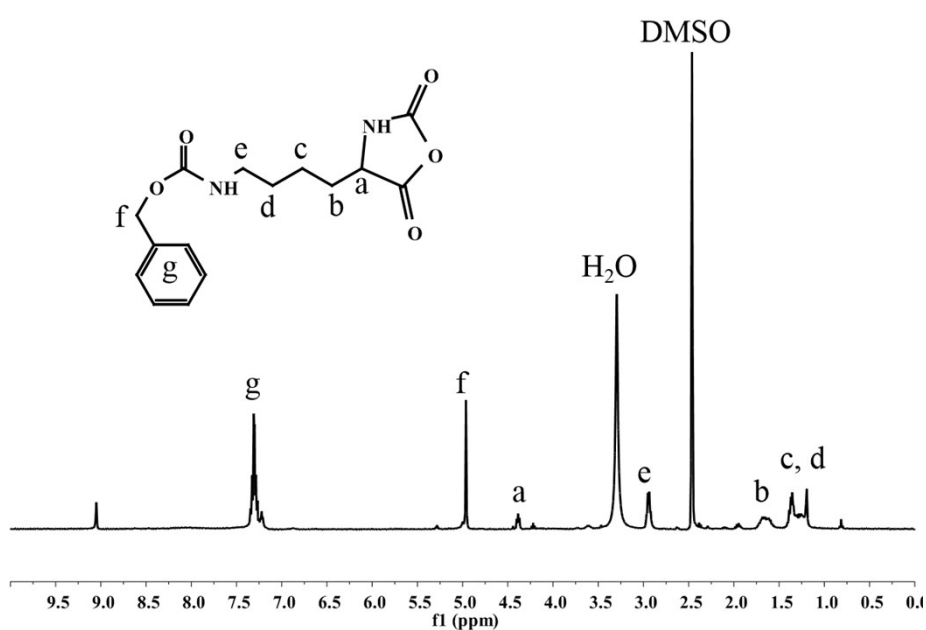

Fig. S1 <sup>1</sup>H NMR spectrum of L-Lys-Cbz-NCA in DMSO-d<sub>6</sub>

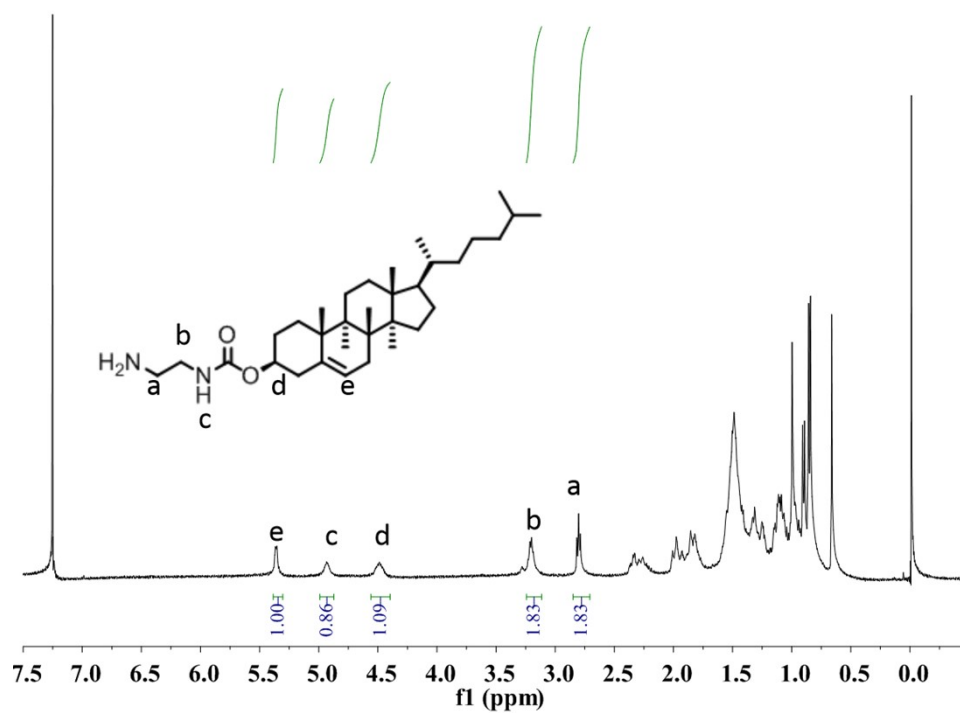

Fig. S2  $^1\text{H}$  NMR spectrum of Chol- $\text{NH}_2$  in  $\text{CCl}_3\text{-d}$

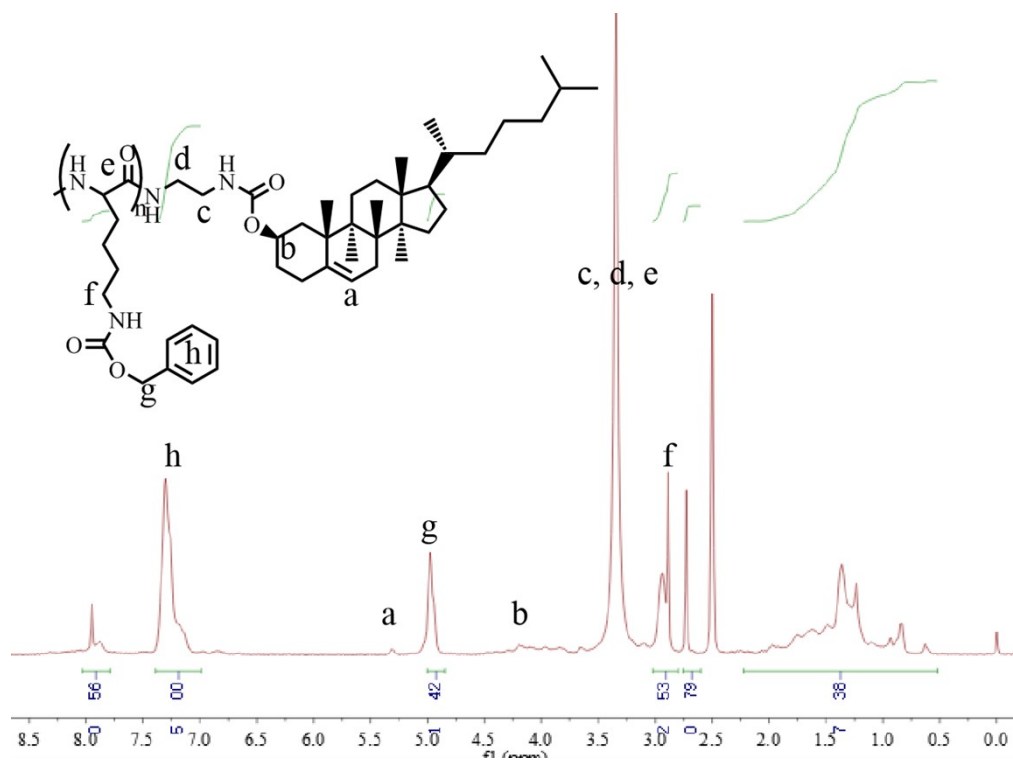

Fig. S3  $^1\text{H}$  NMR spectrum of Chol-*b*-Lys-Cbz in  $\text{DMSO-d}_6$

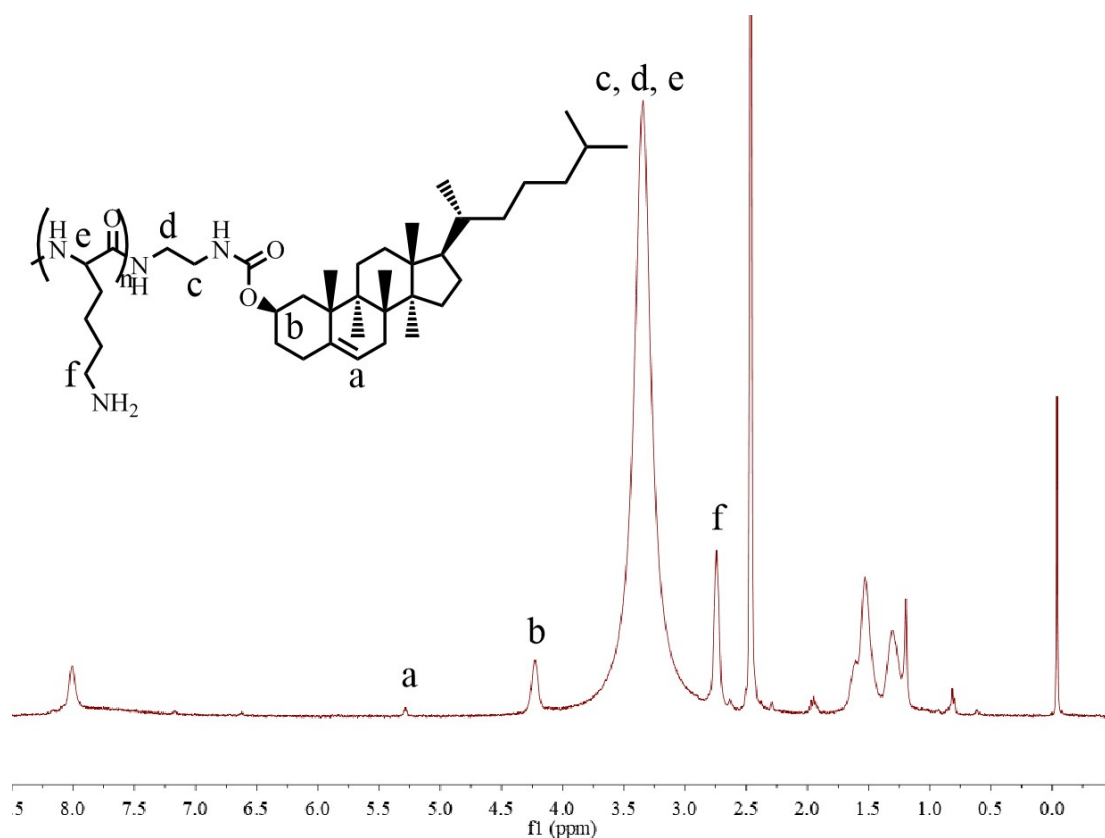

Fig. S4  $^1\text{H}$  NMR spectrum of Chol-*b*-Lys in  $\text{DMSO-d}_6$

### Dynamic light scattering apparatus (DLS)

Measurement of particle size Distribution Polymer Micellar solution was carried out by dynamic light scattering apparatus (DLS) on a Malvern Zetasizer Nano-ZS at a fixed scattering angle of  $90^\circ$ . Measured with polymer concentration of 1 mg/mL for sample preparation.

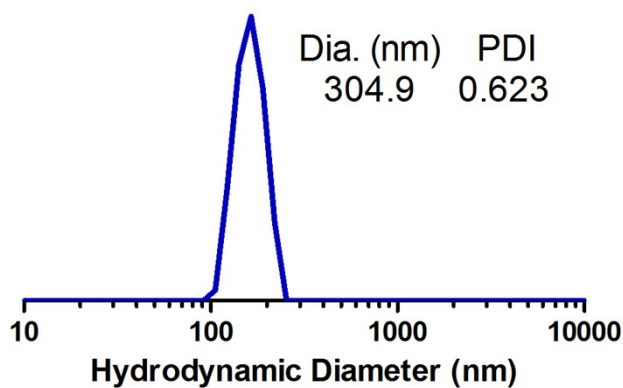

Fig. S5 DLS studies of CL-NPs (by intensity) in water

### **Formulation of M9 medium**

MgSO<sub>4</sub> (1 M), CaCl<sub>2</sub> (1 M) and ZnSO<sub>4</sub> (1 M) were dissolved in double distilled water (10 mL), respectively, and autoclaved for later use. 5×M9 salt solution, including Na<sub>2</sub>PO<sub>4</sub>·7H<sub>2</sub>O, KH<sub>2</sub>PO<sub>4</sub>, NaCl and NH<sub>4</sub>Cl, was dissolved in 200 ml of double distilled water and sterilized at 121 °C for 15 min. Then a 20% glucose solution was prepared with sterilized at 115 °C for 15 min.

Aseptic preparation of M9 medium (1000 mL): 5×M9 salt solution (200 mL), 1 M MgSO<sub>4</sub> (2 mL), 1 M CaCl<sub>2</sub> (0.1 mL), 1 M ZnSO<sub>4</sub> (0.1 mL) and 20% glucose solution (20 mL) were mixed, and the sterilized double distilled water was added to the mixture to reach a total volume of 1000 mL.

### **Scanning electron microscopy (SEM)**

The morphology of the microorganisms before and after treatment with polymer was observed using a field emission SEM (SU8010) operated at an accelerating voltage of 3.0 keV. Samples were treated with gold before observation.

### **Zeta potential**

Zeta potentials were measured on a Water Nano-ZS 90 Nanosizer (Malvern Instrument) at a fixed scattering angle of 90° at room temperature.
